# Supplementary material for: Fragranced consumer products: exposures and effects from emissions
Source: PubMed Central journal article supplement (PMC5093181; doi:10.1007/s11869-016-0442-z), 2016-10-20
Supplement: 11869_2016_442_MOESM1_ESM.pdf [file 11869_2016_442_MOESM1_ESM.pdf]

SURVEY RESULTS - USA POPULATION

**Which fragranced products are you exposed to, at least once a week, from your own use? Air fresheners and deodorizers (e.g., sprays, solids, oils, disks)**

|       |       | Frequency | Percent | Valid Percent | Cumulative Percent |
|-------|-------|-----------|---------|---------------|--------------------|
| Valid | No    | 309       | 27.2    | 27.2          | 27.2               |
|       | Yes   | 827       | 72.8    | 72.8          | 100.0              |
|       | Total | 1136      | 100.0   | 100.0         |                    |

**Which fragranced products are you exposed to, at least once a week, from your own use? Personal care products (e.g., soaps, hand sanitizer, lotions, deodorant, sunscreen, shampoos)**

|       |       | Frequency | Percent | Valid Percent | Cumulative Percent |
|-------|-------|-----------|---------|---------------|--------------------|
| Valid | No    | 127       | 11.2    | 11.2          | 11.2               |
|       | Yes   | 1009      | 88.8    | 88.8          | 100.0              |
|       | Total | 1136      | 100.0   | 100.0         |                    |

**Which fragranced products are you exposed to, at least once a week, from your own use? Cleaning supplies (e.g., all-purpose cleaners, disinfectants, and dishwashing soap)**

|       |       | Frequency | Percent | Valid Percent | Cumulative Percent |
|-------|-------|-----------|---------|---------------|--------------------|
| Valid | No    | 228       | 20.1    | 20.1          | 20.1               |
|       | Yes   | 908       | 79.9    | 79.9          | 100.0              |
|       | Total | 1136      | 100.0   | 100.0         |                    |

**Which fragranced products are you exposed to, at least once a week, from your own use? Laundry products (e.g., detergents, fabric softeners, dryer sheets)**

|       |       | Frequency | Percent | Valid Percent | Cumulative Percent |
|-------|-------|-----------|---------|---------------|--------------------|
| Valid | No    | 181       | 15.9    | 15.9          | 15.9               |
|       | Yes   | 955       | 84.1    | 84.1          | 100.0              |
|       | Total | 1136      | 100.0   | 100.0         |                    |

**Which fragranced products are you exposed to, at least once a week, from your own use? Household products (e.g., scented candles, toilet paper, trash bags, baby products)**

|       |       | Frequency | Percent | Valid Percent | Cumulative Percent |
|-------|-------|-----------|---------|---------------|--------------------|
| Valid | No    | 261       | 23.0    | 23.0          | 23.0               |
|       | Yes   | 875       | 77.0    | 77.0          | 100.0              |
|       | Total | 1136      | 100.0   | 100.0         |                    |

**Which fragranced products are you exposed to, at least once a week, from your own use? Fragrance (e.g., perfume, cologne, after-shave)**

|       |       | Frequency | Percent | Valid Percent | Cumulative Percent |
|-------|-------|-----------|---------|---------------|--------------------|
| Valid | No    | 339       | 29.8    | 29.8          | 29.8               |
|       | Yes   | 797       | 70.2    | 70.2          | 100.0              |
|       | Total | 1136      | 100.0   | 100.0         |                    |

**Which fragranced products are you exposed to, at least once a week, from your own use? Other**

|       |       | Frequency | Percent | Valid Percent | Cumulative Percent |
|-------|-------|-----------|---------|---------------|--------------------|
| Valid | No    | 1102      | 97.0    | 97.0          | 97.0               |
|       | Yes   | 34        | 3.0     | 3.0           | 100.0              |
|       | Total | 1136      | 100.0   | 100.0         |                    |

**Which fragranced products are you exposed to, at least once a week, from your own use? None**

|       |       | Frequency | Percent | Valid Percent | Cumulative Percent |
|-------|-------|-----------|---------|---------------|--------------------|
| Valid | No    | 1117      | 98.3    | 98.3          | 98.3               |
|       | Yes   | 19        | 1.7     | 1.7           | 100.0              |
|       | Total | 1136      | 100.0   | 100.0         |                    |

**Which fragranced products are you exposed to, at least once a week, from others' use? Air fresheners and deodorizers (e.g., sprays, solids, oils, disks)**

|       |       | Frequency | Percent | Valid Percent | Cumulative Percent |
|-------|-------|-----------|---------|---------------|--------------------|
| Valid | No    | 478       | 42.1    | 42.1          | 42.1               |
|       | Yes   | 658       | 57.9    | 57.9          | 100.0              |
|       | Total | 1136      | 100.0   | 100.0         |                    |

**Which fragranced products are you exposed to, at least once a week, from others' use? Personal care products (e.g., soaps, hand sanitizer, lotions, deodorant, sunscreen, shampoos)**

|       |       | Frequency | Percent | Valid Percent | Cumulative Percent |
|-------|-------|-----------|---------|---------------|--------------------|
| Valid | No    | 385       | 33.9    | 33.9          | 33.9               |
|       | Yes   | 751       | 66.1    | 66.1          | 100.0              |
|       | Total | 1136      | 100.0   | 100.0         |                    |

**Which fragranced products are you exposed to, at least once a week, from others' use? Cleaning supplies (e.g., all-purpose cleaners, disinfectants, and dishwashing soap)**

|       |       | Frequency | Percent | Valid Percent | Cumulative Percent |
|-------|-------|-----------|---------|---------------|--------------------|
| Valid | No    | 514       | 45.2    | 45.2          | 45.2               |
|       | Yes   | 622       | 54.8    | 54.8          | 100.0              |
|       | Total | 1136      | 100.0   | 100.0         |                    |

**Which fragranced products are you exposed to, at least once a week, from others' use? Laundry products (e.g., detergents, fabric softeners, dryer sheets)**

|       |       | Frequency | Percent | Valid Percent | Cumulative Percent |
|-------|-------|-----------|---------|---------------|--------------------|
| Valid | No    | 597       | 52.6    | 52.6          | 52.6               |
|       | Yes   | 539       | 47.4    | 47.4          | 100.0              |
|       | Total | 1136      | 100.0   | 100.0         |                    |

**Which fragranced products are you exposed to, at least once a week, from others' use? Household products (e.g., scented candles, toilet paper, trash bags, baby products)**

|       |       | Frequency | Percent | Valid Percent | Cumulative Percent |
|-------|-------|-----------|---------|---------------|--------------------|
| Valid | No    | 542       | 47.7    | 47.7          | 47.7               |
|       | Yes   | 594       | 52.3    | 52.3          | 100.0              |
|       | Total | 1136      | 100.0   | 100.0         |                    |

**Which fragranced products are you exposed to, at least once a week, from others' use? Fragrance (e.g., perfume, cologne, after-shave)**

|       |       | Frequency | Percent | Valid Percent | Cumulative Percent |
|-------|-------|-----------|---------|---------------|--------------------|
| Valid | No    | 356       | 31.3    | 31.3          | 31.3               |
|       | Yes   | 780       | 68.7    | 68.7          | 100.0              |
|       | Total | 1136      | 100.0   | 100.0         |                    |

**Which fragranced products are you exposed to, at least once a week, from others' use? Other**

|       |       | Frequency | Percent | Valid Percent | Cumulative Percent |
|-------|-------|-----------|---------|---------------|--------------------|
| Valid | No    | 1100      | 96.8    | 96.8          | 96.8               |
|       | Yes   | 36        | 3.2     | 3.2           | 100.0              |
|       | Total | 1136      | 100.0   | 100.0         |                    |

**Which fragranced products are you exposed to, at least once a week, from others' use? None**

|       |       | Frequency | Percent | Valid Percent | Cumulative Percent |
|-------|-------|-----------|---------|---------------|--------------------|
| Valid | No    | 1046      | 92.1    | 92.1          | 92.1               |
|       | Yes   | 90        | 7.9     | 7.9           | 100.0              |
|       | Total | 1136      | 100.0   | 100.0         |                    |

**Do you experience any health problems when exposed to air fresheners or deodorizers?**

|       |                     | Frequency | Percent | Valid Percent | Cumulative Percent |
|-------|---------------------|-----------|---------|---------------|--------------------|
| Valid | Yes                 | 232       | 20.4    | 20.4          | 20.4               |
|       | No                  | 791       | 69.6    | 69.6          | 90.1               |
|       | Don't know/not sure | 108       | 9.5     | 9.5           | 99.6               |
|       | Decline to answer   | 5         | .4      | .4            | 100.0              |
|       | Total               | 1136      | 100.0   | 100.0         |                    |

**Which of the following health problems do you experience when exposed to air fresheners or deodorizers?  
Migraine headaches**

|         |        | Frequency | Percent | Valid Percent | Cumulative Percent |
|---------|--------|-----------|---------|---------------|--------------------|
| Valid   | No     | 150       | 13.2    | 64.7          | 64.7               |
|         | Yes    | 82        | 7.2     | 35.3          | 100.0              |
|         | Total  | 232       | 20.4    | 100.0         |                    |
| Missing | System | 904       | 79.6    |               |                    |
|         | Total  | 1136      | 100.0   |               |                    |

**Which of the following health problems do you experience when exposed to air fresheners or deodorizers?  
Asthma attacks**

|         |        | Frequency | Percent | Valid Percent | Cumulative Percent |
|---------|--------|-----------|---------|---------------|--------------------|
| Valid   | No     | 179       | 15.8    | 77.2          | 77.2               |
|         | Yes    | 53        | 4.7     | 22.8          | 100.0              |
|         | Total  | 232       | 20.4    | 100.0         |                    |
| Missing | System | 904       | 79.6    |               |                    |
|         | Total  | 1136      | 100.0   |               |                    |

**Which of the following health problems do you experience when exposed to air fresheners or deodorizers?  
Neurological problems (e.g., dizziness, seizures, head pain, fainting, loss of coordination)**

|         |        | Frequency | Percent | Valid Percent | Cumulative Percent |
|---------|--------|-----------|---------|---------------|--------------------|
| Valid   | No     | 196       | 17.3    | 84.5          | 84.5               |
|         | Yes    | 36        | 3.2     | 15.5          | 100.0              |
|         | Total  | 232       | 20.4    | 100.0         |                    |
| Missing | System | 904       | 79.6    |               |                    |
|         | Total  | 1136      | 100.0   |               |                    |

**Which of the following health problems do you experience when exposed to air fresheners or deodorizers?  
Respiratory problems (e.g., difficulty breathing, coughing, shortness of breath)**

|         |        | Frequency | Percent | Valid Percent | Cumulative Percent |
|---------|--------|-----------|---------|---------------|--------------------|
| Valid   | No     | 124       | 10.9    | 53.4          | 53.4               |
|         | Yes    | 108       | 9.5     | 46.6          | 100.0              |
|         | Total  | 232       | 20.4    | 100.0         |                    |
| Missing | System | 904       | 79.6    |               |                    |
|         | Total  | 1136      | 100.0   |               |                    |

**Which of the following health problems do you experience when exposed to air fresheners or deodorizers?  
Skin problems (e.g., rashes, hives, red skin, tingling skin, dermatitis)**

|         |        | Frequency | Percent | Valid Percent | Cumulative Percent |
|---------|--------|-----------|---------|---------------|--------------------|
| Valid   | No     | 167       | 14.7    | 72.0          | 72.0               |
|         | Yes    | 65        | 5.7     | 28.0          | 100.0              |
|         | Total  | 232       | 20.4    | 100.0         |                    |
| Missing | System | 904       | 79.6    |               |                    |
| Total   |        | 1136      | 100.0   |               |                    |

**Which of the following health problems do you experience when exposed to air fresheners or deodorizers?  
Cognitive problems (e.g., difficulties thinking, concentrating, or remembering)**

|         |        | Frequency | Percent | Valid Percent | Cumulative Percent |
|---------|--------|-----------|---------|---------------|--------------------|
| Valid   | No     | 201       | 17.7    | 86.6          | 86.6               |
|         | Yes    | 31        | 2.7     | 13.4          | 100.0              |
|         | Total  | 232       | 20.4    | 100.0         |                    |
| Missing | System | 904       | 79.6    |               |                    |
| Total   |        | 1136      | 100.0   |               |                    |

**Which of the following health problems do you experience when exposed to air fresheners or deodorizers?  
Mucosal symptoms (e.g., watery or red eyes, nasal congestion, sneezing)**

|         |        | Frequency | Percent | Valid Percent | Cumulative Percent |
|---------|--------|-----------|---------|---------------|--------------------|
| Valid   | No     | 146       | 12.9    | 62.9          | 62.9               |
|         | Yes    | 86        | 7.6     | 37.1          | 100.0              |
|         | Total  | 232       | 20.4    | 100.0         |                    |
| Missing | System | 904       | 79.6    |               |                    |
| Total   |        | 1136      | 100.0   |               |                    |

**Which of the following health problems do you experience when exposed to air fresheners or deodorizers?  
Immune system problems (e.g., swollen lymph glands, fever, fatigue)**

|         |        | Frequency | Percent | Valid Percent | Cumulative Percent |
|---------|--------|-----------|---------|---------------|--------------------|
| Valid   | No     | 211       | 18.6    | 90.9          | 90.9               |
|         | Yes    | 21        | 1.8     | 9.1           | 100.0              |
|         | Total  | 232       | 20.4    | 100.0         |                    |
| Missing | System | 904       | 79.6    |               |                    |
| Total   |        | 1136      | 100.0   |               |                    |

**Which of the following health problems do you experience when exposed to air fresheners or deodorizers?  
Gastrointestinal problems (e.g., nausea, bloating, cramping, diarrhea)**

|         |        | Frequency | Percent | Valid Percent | Cumulative Percent |
|---------|--------|-----------|---------|---------------|--------------------|
| Valid   | No     | 201       | 17.7    | 86.6          | 86.6               |
|         | Yes    | 31        | 2.7     | 13.4          | 100.0              |
|         | Total  | 232       | 20.4    | 100.0         |                    |
| Missing | System | 904       | 79.6    |               |                    |
| Total   |        | 1136      | 100.0   |               |                    |

**Which of the following health problems do you experience when exposed to air fresheners or deodorizers?  
Cardiovascular problems (e.g., fast or irregular heartbeat, jitteriness, chest discomfort)**

|         |        | Frequency | Percent | Valid Percent | Cumulative Percent |
|---------|--------|-----------|---------|---------------|--------------------|
| Valid   | No     | 202       | 17.8    | 87.1          | 87.1               |
|         | Yes    | 30        | 2.6     | 12.9          | 100.0              |
|         | Total  | 232       | 20.4    | 100.0         |                    |
| Missing | System | 904       | 79.6    |               |                    |
| Total   |        | 1136      | 100.0   |               |                    |

**Which of the following health problems do you experience when exposed to air fresheners or deodorizers?  
Musculoskeletal problems (e.g., muscle or joint pain, cramps, weakness)**

|         |        | Frequency | Percent | Valid Percent | Cumulative Percent |
|---------|--------|-----------|---------|---------------|--------------------|
| Valid   | No     | 205       | 18.0    | 88.4          | 88.4               |
|         | Yes    | 27        | 2.4     | 11.6          | 100.0              |
|         | Total  | 232       | 20.4    | 100.0         |                    |
| Missing | System | 904       | 79.6    |               |                    |
| Total   |        | 1136      | 100.0   |               |                    |

**Which of the following health problems do you experience when exposed to air fresheners or deodorizers?  
Other**

|         |        | Frequency | Percent | Valid Percent | Cumulative Percent |
|---------|--------|-----------|---------|---------------|--------------------|
| Valid   | No     | 224       | 19.7    | 96.6          | 96.6               |
|         | Yes    | 8         | .7      | 3.4           | 100.0              |
|         | Total  | 232       | 20.4    | 100.0         |                    |
| Missing | System | 904       | 79.6    |               |                    |
| Total   |        | 1136      | 100.0   |               |                    |

**Do you experience any health problems from the scent of laundry products coming from a dryer vent?**

|       |                     | Frequency | Percent | Valid Percent | Cumulative Percent |
|-------|---------------------|-----------|---------|---------------|--------------------|
| Valid | Yes                 | 142       | 12.5    | 12.5          | 12.5               |
|       | No                  | 905       | 79.7    | 79.7          | 92.2               |
|       | Don't know/not sure | 88        | 7.7     | 7.7           | 99.9               |
|       | Decline to answer   | 1         | .1      | .1            | 100.0              |
|       | Total               | 1136      | 100.0   | 100.0         |                    |

**Which of the following health problems do you suffer from the scent of laundry products coming from a dryer vent? Migraine headaches**

|         |        | Frequency | Percent | Valid Percent | Cumulative Percent |
|---------|--------|-----------|---------|---------------|--------------------|
| Valid   | No     | 105       | 9.2     | 73.9          | 73.9               |
|         | Yes    | 37        | 3.3     | 26.1          | 100.0              |
|         | Total  | 142       | 12.5    | 100.0         |                    |
| Missing | System | 994       | 87.5    |               |                    |
| Total   |        | 1136      | 100.0   |               |                    |

**Which of the following health problems do you suffer from the scent of laundry products coming from a dryer vent? Asthma attacks**

|         |        | Frequency | Percent | Valid Percent | Cumulative Percent |
|---------|--------|-----------|---------|---------------|--------------------|
| Valid   | No     | 114       | 10.0    | 80.3          | 80.3               |
|         | Yes    | 28        | 2.5     | 19.7          | 100.0              |
|         | Total  | 142       | 12.5    | 100.0         |                    |
| Missing | System | 994       | 87.5    |               |                    |
| Total   |        | 1136      | 100.0   |               |                    |

**Which of the following health problems do you suffer from the scent of laundry products coming from a dryer vent? Neurological problems (e.g., dizziness, seizures, head pain, fainting, loss of coordination)**

|         |        | Frequency | Percent | Valid Percent | Cumulative Percent |
|---------|--------|-----------|---------|---------------|--------------------|
| Valid   | No     | 118       | 10.4    | 83.1          | 83.1               |
|         | Yes    | 24        | 2.1     | 16.9          | 100.0              |
|         | Total  | 142       | 12.5    | 100.0         |                    |
| Missing | System | 994       | 87.5    |               |                    |
| Total   |        | 1136      | 100.0   |               |                    |

**Which of the following health problems do you suffer from the scent of laundry products coming from a dryer vent? Respiratory problems (e.g., difficulty breathing, coughing, shortness of breath)**

|         |        | Frequency | Percent | Valid Percent | Cumulative Percent |
|---------|--------|-----------|---------|---------------|--------------------|
| Valid   | No     | 96        | 8.5     | 67.6          | 67.6               |
|         | Yes    | 46        | 4.0     | 32.4          | 100.0              |
|         | Total  | 142       | 12.5    | 100.0         |                    |
| Missing | System | 994       | 87.5    |               |                    |
| Total   |        | 1136      | 100.0   |               |                    |



**Which of the following health problems do you suffer from the scent of laundry products coming from a dryer vent? Skin problems (e.g., rashes, hives, red skin, tingling skin, dermatitis)**

|         |        | Frequency | Percent | Valid Percent | Cumulative Percent |
|---------|--------|-----------|---------|---------------|--------------------|
| Valid   | No     | 101       | 8.9     | 71.1          | 71.1               |
|         | Yes    | 41        | 3.6     | 28.9          | 100.0              |
|         | Total  | 142       | 12.5    | 100.0         |                    |
| Missing | System | 994       | 87.5    |               |                    |
| Total   |        | 1136      | 100.0   |               |                    |

**Which of the following health problems do you suffer from the scent of laundry products coming from a dryer vent? Cognitive problems (e.g., difficulties thinking, concentrating, or remembering)**

|         |        | Frequency | Percent | Valid Percent | Cumulative Percent |
|---------|--------|-----------|---------|---------------|--------------------|
| Valid   | No     | 127       | 11.2    | 89.4          | 89.4               |
|         | Yes    | 15        | 1.3     | 10.6          | 100.0              |
|         | Total  | 142       | 12.5    | 100.0         |                    |
| Missing | System | 994       | 87.5    |               |                    |
| Total   |        | 1136      | 100.0   |               |                    |

**Which of the following health problems do you suffer from the scent of laundry products coming from a dryer vent? Mucosal symptoms (e.g., watery or red eyes, nasal congestion, sneezing)**

|         |        | Frequency | Percent | Valid Percent | Cumulative Percent |
|---------|--------|-----------|---------|---------------|--------------------|
| Valid   | No     | 94        | 8.3     | 66.2          | 66.2               |
|         | Yes    | 48        | 4.2     | 33.8          | 100.0              |
|         | Total  | 142       | 12.5    | 100.0         |                    |
| Missing | System | 994       | 87.5    |               |                    |
| Total   |        | 1136      | 100.0   |               |                    |

**Which of the following health problems do you suffer from the scent of laundry products coming from a dryer vent? Immune system problems (e.g., swollen lymph glands, fever, fatigue)**

|         |        | Frequency | Percent | Valid Percent | Cumulative Percent |
|---------|--------|-----------|---------|---------------|--------------------|
| Valid   | No     | 123       | 10.8    | 86.6          | 86.6               |
|         | Yes    | 19        | 1.7     | 13.4          | 100.0              |
|         | Total  | 142       | 12.5    | 100.0         |                    |
| Missing | System | 994       | 87.5    |               |                    |
| Total   |        | 1136      | 100.0   |               |                    |

**Which of the following health problems do you suffer from the scent of laundry products coming from a dryer vent? Gastrointestinal problems (e.g., nausea, bloating, cramping, diarrhea)**

|         |        | Frequency | Percent | Valid Percent | Cumulative Percent |
|---------|--------|-----------|---------|---------------|--------------------|
| Valid   | No     | 113       | 9.9     | 79.6          | 79.6               |
|         | Yes    | 29        | 2.6     | 20.4          | 100.0              |
|         | Total  | 142       | 12.5    | 100.0         |                    |
| Missing | System | 994       | 87.5    |               |                    |
| Total   |        | 1136      | 100.0   |               |                    |

**Which of the following health problems do you suffer from the scent of laundry products coming from a dryer vent? Cardiovascular problems (e.g., fast or irregular heartbeat, jitteriness, chest discomfort)**

|         |        | Frequency | Percent | Valid Percent | Cumulative Percent |
|---------|--------|-----------|---------|---------------|--------------------|
| Valid   | No     | 127       | 11.2    | 89.4          | 89.4               |
|         | Yes    | 15        | 1.3     | 10.6          | 100.0              |
|         | Total  | 142       | 12.5    | 100.0         |                    |
| Missing | System | 994       | 87.5    |               |                    |
| Total   |        | 1136      | 100.0   |               |                    |

**Which of the following health problems do you suffer from the scent of laundry products coming from a dryer vent? Musculoskeletal problems (e.g., muscle or joint pain, cramps, weakness)**

|         |        | Frequency | Percent | Valid Percent | Cumulative Percent |
|---------|--------|-----------|---------|---------------|--------------------|
| Valid   | No     | 119       | 10.5    | 83.8          | 83.8               |
|         | Yes    | 23        | 2.0     | 16.2          | 100.0              |
|         | Total  | 142       | 12.5    | 100.0         |                    |
| Missing | System | 994       | 87.5    |               |                    |
| Total   |        | 1136      | 100.0   |               |                    |

**Which of the following health problems do you suffer from the scent of laundry products coming from a dryer vent? Other**

|         |        | Frequency | Percent | Valid Percent | Cumulative Percent |
|---------|--------|-----------|---------|---------------|--------------------|
| Valid   | No     | 138       | 12.1    | 97.2          | 97.2               |
|         | Yes    | 4         | .4      | 2.8           | 100.0              |
|         | Total  | 142       | 12.5    | 100.0         |                    |
| Missing | System | 994       | 87.5    |               |                    |
| Total   |        | 1136      | 100.0   |               |                    |

**Do you experience any health problems from being in a room after it has been cleaned with scented products?**

|       |                     | Frequency | Percent | Valid Percent | Cumulative Percent |
|-------|---------------------|-----------|---------|---------------|--------------------|
| Valid | Yes                 | 224       | 19.7    | 19.7          | 19.7               |
|       | No                  | 838       | 73.8    | 73.8          | 93.5               |
|       | Don't know/not sure | 73        | 6.4     | 6.4           | 99.9               |
|       | Decline to answer   | 1         | .1      | .1            | 100.0              |
|       | Total               | 1136      | 100.0   | 100.0         |                    |

**Which of the following health problems do you experience from being in a room after it has been cleaned with scented? Migraine headaches**

|         |        | Frequency | Percent | Valid Percent | Cumulative Percent |
|---------|--------|-----------|---------|---------------|--------------------|
| Valid   | No     | 149       | 13.1    | 66.5          | 66.5               |
|         | Yes    | 75        | 6.6     | 33.5          | 100.0              |
|         | Total  | 224       | 19.7    | 100.0         |                    |
| Missing | System | 912       | 80.3    |               |                    |
| Total   |        | 1136      | 100.0   |               |                    |

**Which of the following health problems do you experience from being in a room after it has been cleaned with scented? Asthma attacks**

|         |        | Frequency | Percent | Valid Percent | Cumulative Percent |
|---------|--------|-----------|---------|---------------|--------------------|
| Valid   | No     | 178       | 15.7    | 79.5          | 79.5               |
|         | Yes    | 46        | 4.0     | 20.5          | 100.0              |
|         | Total  | 224       | 19.7    | 100.0         |                    |
| Missing | System | 912       | 80.3    |               |                    |
| Total   |        | 1136      | 100.0   |               |                    |

**Which of the following health problems do you experience from being in a room after it has been cleaned with scented? Neurological problems (e.g., dizziness, seizures, head pain, fainting, loss of coordination)**

|         |        | Frequency | Percent | Valid Percent | Cumulative Percent |
|---------|--------|-----------|---------|---------------|--------------------|
| Valid   | No     | 177       | 15.6    | 79.0          | 79.0               |
|         | Yes    | 47        | 4.1     | 21.0          | 100.0              |
|         | Total  | 224       | 19.7    | 100.0         |                    |
| Missing | System | 912       | 80.3    |               |                    |
| Total   |        | 1136      | 100.0   |               |                    |

**Which of the following health problems do you experience from being in a room after it has been cleaned with scented? Respiratory problems (e.g., difficulty breathing, coughing, shortness of breath)**

|         |        | Frequency | Percent | Valid Percent | Cumulative Percent |
|---------|--------|-----------|---------|---------------|--------------------|
| Valid   | No     | 115       | 10.1    | 51.3          | 51.3               |
|         | Yes    | 109       | 9.6     | 48.7          | 100.0              |
|         | Total  | 224       | 19.7    | 100.0         |                    |
| Missing | System | 912       | 80.3    |               |                    |
| Total   |        | 1136      | 100.0   |               |                    |

**Which of the following health problems do you experience from being in a room after it has been cleaned with scented? Skin problems (e.g., rashes, hives, red skin, tingling skin, dermatitis)**

|         |        | Frequency | Percent | Valid Percent | Cumulative Percent |
|---------|--------|-----------|---------|---------------|--------------------|
| Valid   | No     | 179       | 15.8    | 79.9          | 79.9               |
|         | Yes    | 45        | 4.0     | 20.1          | 100.0              |
|         | Total  | 224       | 19.7    | 100.0         |                    |
| Missing | System | 912       | 80.3    |               |                    |
| Total   |        | 1136      | 100.0   |               |                    |

**Which of the following health problems do you experience from being in a room after it has been cleaned with scented? Cognitive problems (e.g., difficulties thinking, concentrating, or remembering)**

|         |        | Frequency | Percent | Valid Percent | Cumulative Percent |
|---------|--------|-----------|---------|---------------|--------------------|
| Valid   | No     | 193       | 17.0    | 86.2          | 86.2               |
|         | Yes    | 31        | 2.7     | 13.8          | 100.0              |
|         | Total  | 224       | 19.7    | 100.0         |                    |
| Missing | System | 912       | 80.3    |               |                    |
| Total   |        | 1136      | 100.0   |               |                    |

**Which of the following health problems do you experience from being in a room after it has been cleaned with scented? Mucosal symptoms (e.g., watery or red eyes, nasal congestion, sneezing)**

|         |        | Frequency | Percent | Valid Percent | Cumulative Percent |
|---------|--------|-----------|---------|---------------|--------------------|
| Valid   | No     | 141       | 12.4    | 62.9          | 62.9               |
|         | Yes    | 83        | 7.3     | 37.1          | 100.0              |
|         | Total  | 224       | 19.7    | 100.0         |                    |
| Missing | System | 912       | 80.3    |               |                    |
| Total   |        | 1136      | 100.0   |               |                    |

**Which of the following health problems do you experience from being in a room after it has been cleaned with scented? Immune system problems (e.g., swollen lymph glands, fever, fatigue)**

|         |        | Frequency | Percent | Valid Percent | Cumulative Percent |
|---------|--------|-----------|---------|---------------|--------------------|
| Valid   | No     | 201       | 17.7    | 89.7          | 89.7               |
|         | Yes    | 23        | 2.0     | 10.3          | 100.0              |
|         | Total  | 224       | 19.7    | 100.0         |                    |
| Missing | System | 912       | 80.3    |               |                    |
| Total   |        | 1136      | 100.0   |               |                    |

**Which of the following health problems do you experience from being in a room after it has been cleaned with scented? Gastrointestinal problems (e.g., nausea, bloating, cramping, diarrhea)**

|         |        | Frequency | Percent | Valid Percent | Cumulative Percent |
|---------|--------|-----------|---------|---------------|--------------------|
| Valid   | No     | 192       | 16.9    | 85.7          | 85.7               |
|         | Yes    | 32        | 2.8     | 14.3          | 100.0              |
|         | Total  | 224       | 19.7    | 100.0         |                    |
| Missing | System | 912       | 80.3    |               |                    |
| Total   |        | 1136      | 100.0   |               |                    |

**Which of the following health problems do you experience from being in a room after it has been cleaned with scented? Cardiovascular problems (e.g., fast or irregular heartbeat, jitteriness, chest discomfort)**

|         |        | Frequency | Percent | Valid Percent | Cumulative Percent |
|---------|--------|-----------|---------|---------------|--------------------|
| Valid   | No     | 198       | 17.4    | 88.4          | 88.4               |
|         | Yes    | 26        | 2.3     | 11.6          | 100.0              |
|         | Total  | 224       | 19.7    | 100.0         |                    |
| Missing | System | 912       | 80.3    |               |                    |
| Total   |        | 1136      | 100.0   |               |                    |

**Which of the following health problems do you experience from being in a room after it has been cleaned with scented? Musculoskeletal problems (e.g., muscle or joint pain, cramps, weakness)**

|         |        | Frequency | Percent | Valid Percent | Cumulative Percent |
|---------|--------|-----------|---------|---------------|--------------------|
| Valid   | No     | 201       | 17.7    | 89.7          | 89.7               |
|         | Yes    | 23        | 2.0     | 10.3          | 100.0              |
|         | Total  | 224       | 19.7    | 100.0         |                    |
| Missing | System | 912       | 80.3    |               |                    |
| Total   |        | 1136      | 100.0   |               |                    |

**Which of the following health problems do you experience from being in a room after it has been cleaned with scented? Other**

|         |        | Frequency | Percent | Valid Percent | Cumulative Percent |
|---------|--------|-----------|---------|---------------|--------------------|
| Valid   | No     | 220       | 19.4    | 98.2          | 98.2               |
|         | Yes    | 4         | .4      | 1.8           | 100.0              |
|         | Total  | 224       | 19.7    | 100.0         |                    |
| Missing | System | 912       | 80.3    |               |                    |
| Total   |        | 1136      | 100.0   |               |                    |

**Do you experience any health problems from being near someone who is wearing a fragranced product?**

|       |                     | Frequency | Percent | Valid Percent | Cumulative Percent |
|-------|---------------------|-----------|---------|---------------|--------------------|
| Valid | Yes                 | 268       | 23.6    | 23.6          | 23.6               |
|       | No                  | 798       | 70.2    | 70.2          | 93.8               |
|       | Don't know/not sure | 68        | 6.0     | 6.0           | 99.8               |
|       | Decline to answer   | 2         | .2      | .2            | 100.0              |
|       | Total               | 1136      | 100.0   | 100.0         |                    |

**Which of the following health problems do you experience from being near someone who is wearing a fragranced product? Migraine headaches**

|         |        | Frequency | Percent | Valid Percent | Cumulative Percent |
|---------|--------|-----------|---------|---------------|--------------------|
| Valid   | No     | 172       | 15.1    | 64.2          | 64.2               |
|         | Yes    | 96        | 8.5     | 35.8          | 100.0              |
|         | Total  | 268       | 23.6    | 100.0         |                    |
| Missing | System | 868       | 76.4    |               |                    |
| Total   |        | 1136      | 100.0   |               |                    |

**Which of the following health problems do you experience from being near someone who is wearing a fragranced product? Asthma attacks**

|         |        | Frequency | Percent | Valid Percent | Cumulative Percent |
|---------|--------|-----------|---------|---------------|--------------------|
| Valid   | No     | 224       | 19.7    | 83.6          | 83.6               |
|         | Yes    | 44        | 3.9     | 16.4          | 100.0              |
|         | Total  | 268       | 23.6    | 100.0         |                    |
| Missing | System | 868       | 76.4    |               |                    |
| Total   |        | 1136      | 100.0   |               |                    |

**Which of the following health problems do you experience from being near someone who is wearing a fragranced product? Neurological problems (e.g., dizziness, seizures, head pain, fainting, loss of coordination)**

|         |        | Frequency | Percent | Valid Percent | Cumulative Percent |
|---------|--------|-----------|---------|---------------|--------------------|
| Valid   | No     | 227       | 20.0    | 84.7          | 84.7               |
|         | Yes    | 41        | 3.6     | 15.3          | 100.0              |
|         | Total  | 268       | 23.6    | 100.0         |                    |
| Missing | System | 868       | 76.4    |               |                    |
| Total   |        | 1136      | 100.0   |               |                    |

**Which of the following health problems do you experience from being near someone who is wearing a fragranced product? Respiratory problems (e.g., difficulty breathing, coughing, shortness of breath)**

|         |        | Frequency | Percent | Valid Percent | Cumulative Percent |
|---------|--------|-----------|---------|---------------|--------------------|
| Valid   | No     | 150       | 13.2    | 56.0          | 56.0               |
|         | Yes    | 118       | 10.4    | 44.0          | 100.0              |
|         | Total  | 268       | 23.6    | 100.0         |                    |
| Missing | System | 868       | 76.4    |               |                    |
| Total   |        | 1136      | 100.0   |               |                    |

**Which of the following health problems do you experience from being near someone who is wearing a fragranced product? Skin problems (e.g., rashes, hives, red skin, tingling skin, dermatitis)**

|         |        | Frequency | Percent | Valid Percent | Cumulative Percent |
|---------|--------|-----------|---------|---------------|--------------------|
| Valid   | No     | 229       | 20.2    | 85.4          | 85.4               |
|         | Yes    | 39        | 3.4     | 14.6          | 100.0              |
|         | Total  | 268       | 23.6    | 100.0         |                    |
| Missing | System | 868       | 76.4    |               |                    |
| Total   |        | 1136      | 100.0   |               |                    |

**Which of the following health problems do you experience from being near someone who is wearing a fragranced product? Cognitive problems (e.g., difficulties thinking, concentrating, or remembering)**

|         |        | Frequency | Percent | Valid Percent | Cumulative Percent |
|---------|--------|-----------|---------|---------------|--------------------|
| Valid   | No     | 238       | 21.0    | 88.8          | 88.8               |
|         | Yes    | 30        | 2.6     | 11.2          | 100.0              |
|         | Total  | 268       | 23.6    | 100.0         |                    |
| Missing | System | 868       | 76.4    |               |                    |
| Total   |        | 1136      | 100.0   |               |                    |

**Which of the following health problems do you experience from being near someone who is wearing a fragranced product? Mucosal symptoms (e.g., watery or red eyes, nasal congestion, sneezing)**

|         |        | Frequency | Percent | Valid Percent | Cumulative Percent |
|---------|--------|-----------|---------|---------------|--------------------|
| Valid   | No     | 170       | 15.0    | 63.4          | 63.4               |
|         | Yes    | 98        | 8.6     | 36.6          | 100.0              |
|         | Total  | 268       | 23.6    | 100.0         |                    |
| Missing | System | 868       | 76.4    |               |                    |
| Total   |        | 1136      | 100.0   |               |                    |

**Which of the following health problems do you experience from being near someone who is wearing a fragranced product? Immune system problems (e.g., swollen lymph glands, fever, fatigue)**

|         |        | Frequency | Percent | Valid Percent | Cumulative Percent |
|---------|--------|-----------|---------|---------------|--------------------|
| Valid   | No     | 249       | 21.9    | 92.9          | 92.9               |
|         | Yes    | 19        | 1.7     | 7.1           | 100.0              |
|         | Total  | 268       | 23.6    | 100.0         |                    |
| Missing | System | 868       | 76.4    |               |                    |
| Total   |        | 1136      | 100.0   |               |                    |

**Which of the following health problems do you experience from being near someone who is wearing a fragranced product? Gastrointestinal problems (e.g., nausea, bloating, cramping, diarrhea)**

|         |        | Frequency | Percent | Valid Percent | Cumulative Percent |
|---------|--------|-----------|---------|---------------|--------------------|
| Valid   | No     | 237       | 20.9    | 88.4          | 88.4               |
|         | Yes    | 31        | 2.7     | 11.6          | 100.0              |
|         | Total  | 268       | 23.6    | 100.0         |                    |
| Missing | System | 868       | 76.4    |               |                    |
| Total   |        | 1136      | 100.0   |               |                    |

**Which of the following health problems do you experience from being near someone who is wearing a fragranced product? Cardiovascular problems (e.g., fast or irregular heartbeat, jitteriness, chest discomfort)**

|         |        | Frequency | Percent | Valid Percent | Cumulative Percent |
|---------|--------|-----------|---------|---------------|--------------------|
| Valid   | No     | 248       | 21.8    | 92.5          | 92.5               |
|         | Yes    | 20        | 1.8     | 7.5           | 100.0              |
|         | Total  | 268       | 23.6    | 100.0         |                    |
| Missing | System | 868       | 76.4    |               |                    |
| Total   |        | 1136      | 100.0   |               |                    |

**Which of the following health problems do you experience from being near someone who is wearing a fragranced product? Musculoskeletal problems (e.g., muscle or joint pain, cramps, weakness)**

|         |        | Frequency | Percent | Valid Percent | Cumulative Percent |
|---------|--------|-----------|---------|---------------|--------------------|
| Valid   | No     | 251       | 22.1    | 93.7          | 93.7               |
|         | Yes    | 17        | 1.5     | 6.3           | 100.0              |
|         | Total  | 268       | 23.6    | 100.0         |                    |
| Missing | System | 868       | 76.4    |               |                    |
| Total   |        | 1136      | 100.0   |               |                    |

**Which of the following health problems do you experience from being near someone who is wearing a fragranced product? Other**

|         |        | Frequency | Percent | Valid Percent | Cumulative Percent |
|---------|--------|-----------|---------|---------------|--------------------|
| Valid   | No     | 261       | 23.0    | 97.4          | 97.4               |
|         | Yes    | 7         | .6      | 2.6           | 100.0              |
|         | Total  | 268       | 23.6    | 100.0         |                    |
| Missing | System | 868       | 76.4    |               |                    |
| Total   |        | 1136      | 100.0   |               |                    |



| <b>Product Use</b>                            | <b>own use</b> | <b>others' use</b> |
|-----------------------------------------------|----------------|--------------------|
|                                               | 1137           | 1137               |
|                                               | 100.00%        | 100.00%            |
| Yes (Net)                                     | 1118           | 1047               |
|                                               | 98.30%         | 92.10%             |
| Air fresheners and deodorizers                | 828            | 658                |
|                                               | 72.80%         | 57.90%             |
| Personal care products                        | 1010           | 751                |
|                                               | 88.80%         | 66.10%             |
| Cleaning supplies                             | 909            | 622                |
|                                               | 79.90%         | 54.80%             |
| Laundry products                              | 956            | 539                |
|                                               | 84.10%         | 47.40%             |
| Household products                            | 876            | 594                |
|                                               | 77.00%         | 52.30%             |
| Fragrance                                     | 798            | 781                |
|                                               | 70.20%         | 68.70%             |
| Other                                         | 34             | 36                 |
|                                               | 3.00%          | 3.20%              |
| None                                          | 19             | 90                 |
|                                               | 1.70%          | 7.90%              |
| Total (own use, others' use, or both) = 99.1% |                |                    |

| <b>Health Effects from Product Exposure</b>         |         |
|-----------------------------------------------------|---------|
|                                                     | 1137    |
|                                                     | 100.00% |
| Respiratory problems                                | 211     |
|                                                     | 18.60%  |
| Mucosal symptoms                                    | 184     |
|                                                     | 16.20%  |
| Migraine headaches                                  | 179     |
|                                                     | 15.70%  |
| Skin problems                                       | 121     |
|                                                     | 10.60%  |
| Asthma attacks                                      | 91      |
|                                                     | 8.00%   |
| Neurological problems                               | 82      |
|                                                     | 7.20%   |
| Cognitive problems                                  | 66      |
|                                                     | 5.80%   |
| Gastrointestinal problems                           | 63      |
|                                                     | 5.50%   |
| Cardiovascular problems                             | 50      |
|                                                     | 4.40%   |
| Immune system problems                              | 45      |
|                                                     | 4.00%   |
| Musculoskeletal problems                            | 43      |
|                                                     | 3.80%   |
| Other                                               | 19      |
|                                                     | 1.70%   |
| Total (reporting one or more health effects) 34.70% |         |

**Do any of these health problems substantially limit one or more major life activities, such as seeing, hearing, eating, sleeping, walking, standing, lifting, bending, speaking, breathing, learning, reading, concentrating, thinking, communicating, or working, for you personally?**

|         |                     | Frequency | Percent | Valid Percent | Cumulative Percent |
|---------|---------------------|-----------|---------|---------------|--------------------|
| Valid   | Yes                 | 195       | 17.2    | 49.5          | 49.5               |
|         | No                  | 175       | 15.4    | 44.4          | 93.9               |
|         | Don't know/not sure | 22        | 1.9     | 5.6           | 99.5               |
|         | Decline to answer   | 2         | .2      | .5            | 100.0              |
|         | Total               | 394       | 34.7    | 100.0         |                    |
| Missing | System              | 742       | 65.3    |               |                    |
| Total   |                     | 1136      | 100.0   |               |                    |

**Have you ever been unable or reluctant to use the toilets in a public place, because of the presence of an air freshener, deodorizer, or scented product?**

|       |                   | Frequency | Percent | Valid Percent | Cumulative Percent |
|-------|-------------------|-----------|---------|---------------|--------------------|
| Valid | Yes               | 199       | 17.5    | 17.5          | 17.5               |
|       | No                | 896       | 78.9    | 78.9          | 96.4               |
|       | Neutral/not sure  | 40        | 3.5     | 3.5           | 99.9               |
|       | Decline to answer | 1         | .1      | .1            | 100.0              |
|       | Total             | 1136      | 100.0   | 100.0         |                    |

**If you enter a business, and you smell air fresheners or some fragranced product, do you want to leave as quickly as possible?**

|       |                   | Frequency | Percent | Valid Percent | Cumulative Percent |
|-------|-------------------|-----------|---------|---------------|--------------------|
| Valid | Yes               | 229       | 20.2    | 20.2          | 20.2               |
|       | No                | 786       | 69.2    | 69.2          | 89.3               |
|       | Neutral/not sure  | 120       | 10.6    | 10.6          | 99.9               |
|       | Decline to answer | 1         | .1      | .1            | 100.0              |
|       | Total             | 1136      | 100.0   | 100.0         |                    |

**Have you ever been unable or reluctant to wash your hands with soap in a public place, because you know or suspect that the soap is fragranced?**

|       |                   | Frequency | Percent | Valid Percent | Cumulative Percent |
|-------|-------------------|-----------|---------|---------------|--------------------|
| Valid | Yes               | 160       | 14.1    | 14.1          | 14.1               |
|       | No                | 923       | 81.3    | 81.3          | 95.3               |
|       | Neutral/not sure  | 50        | 4.4     | 4.4           | 99.7               |
|       | Decline to answer | 3         | .3      | .3            | 100.0              |
|       | Total             | 1136      | 100.0   | 100.0         |                    |

**Are you aware that a 'fragrance' in a product is typically a chemical mixture of several dozen to several hundred chemicals, mostly synthetic and derived from petrochemicals?**

|       |                     | Frequency | Percent | Valid Percent | Cumulative Percent |
|-------|---------------------|-----------|---------|---------------|--------------------|
| Valid | Yes                 | 499       | 43.9    | 43.9          | 43.9               |
|       | No                  | 527       | 46.4    | 46.4          | 90.3               |
|       | Don't know/not sure | 107       | 9.4     | 9.4           | 99.7               |
|       | Decline to answer   | 3         | .3      | .3            | 100.0              |
|       | Total               | 1136      | 100.0   | 100.0         |                    |

**Are you aware that fragrance chemicals do not need to be fully disclosed on the product label or material safety data sheet?**

|       |                     | Frequency | Percent | Valid Percent | Cumulative Percent |
|-------|---------------------|-----------|---------|---------------|--------------------|
| Valid | Yes                 | 293       | 25.8    | 25.8          | 25.8               |
|       | No                  | 734       | 64.6    | 64.6          | 90.4               |
|       | Don't know/not sure | 107       | 9.4     | 9.4           | 99.8               |
|       | Decline to answer   | 2         | .2      | .2            | 100.0              |
|       | Total               | 1136      | 100.0   | 100.0         |                    |

**Are you aware that fragranced products typically emit hazardous air pollutants such as formaldehyde?**

|       |                     | Frequency | Percent | Valid Percent | Cumulative Percent |
|-------|---------------------|-----------|---------|---------------|--------------------|
| Valid | Yes                 | 282       | 24.8    | 24.8          | 24.8               |
|       | No                  | 764       | 67.3    | 67.3          | 92.1               |
|       | Don't know/not sure | 86        | 7.6     | 7.6           | 99.6               |
|       | Decline to answer   | 4         | .4      | .4            | 100.0              |
|       | Total               | 1136      | 100.0   | 100.0         |                    |

**Are you aware that even so-called natural, green, and organic fragranced products typically emit hazardous air pollutants?**

|       |                     | Frequency | Percent | Valid Percent | Cumulative Percent |
|-------|---------------------|-----------|---------|---------------|--------------------|
| Valid | Yes                 | 219       | 19.3    | 19.3          | 19.3               |
|       | No                  | 825       | 72.6    | 72.6          | 91.9               |
|       | Don't know/not sure | 88        | 7.7     | 7.7           | 99.6               |
|       | Decline to answer   | 4         | .4      | .4            | 100.0              |
|       | Total               | 1136      | 100.0   | 100.0         |                    |

**If you knew that a fragranced product emitted hazardous air pollutants, would you still use it?**

|       |                     | Frequency | Percent | Valid Percent | Cumulative Percent |
|-------|---------------------|-----------|---------|---------------|--------------------|
| Valid | Yes                 | 191       | 16.8    | 16.8          | 16.8               |
|       | No                  | 683       | 60.1    | 60.1          | 76.9               |
|       | Don't know/not sure | 259       | 22.8    | 22.8          | 99.7               |
|       | Decline to answer   | 3         | .3      | .3            | 100.0              |
|       | Total               | 1136      | 100.0   | 100.0         |                    |

**Have you ever been prevented from going to some place because you would be exposed to a fragrance product that would make you sick?**

|       |                     | Frequency | Percent | Valid Percent | Cumulative Percent |
|-------|---------------------|-----------|---------|---------------|--------------------|
| Valid | Yes                 | 258       | 22.7    | 22.7          | 22.7               |
|       | No                  | 818       | 72.0    | 72.0          | 94.7               |
|       | Don't know/not sure | 58        | 5.1     | 5.1           | 99.8               |
|       | Decline to answer   | 2         | .2      | .2            | 100.0              |
|       | Total               | 1136      | 100.0   | 100.0         |                    |

**Has any exposure to fragranced products in your work environment caused you to become sick, lose work days, or lose a job?**

|       |                     | Frequency | Percent | Valid Percent | Cumulative Percent |
|-------|---------------------|-----------|---------|---------------|--------------------|
| Valid | Yes                 | 172       | 15.1    | 15.1          | 15.1               |
|       | No                  | 909       | 80.0    | 80.0          | 95.2               |
|       | Don't know/not sure | 54        | 4.8     | 4.8           | 99.9               |
|       | Decline to answer   | 1         | .1      | .1            | 100.0              |
|       | Total               | 1136      | 100.0   | 100.0         |                    |

**Would you be supportive of a fragrance-free policy in the workplace?**

|       |                   | Frequency | Percent | Valid Percent | Cumulative Percent |
|-------|-------------------|-----------|---------|---------------|--------------------|
| Valid | Yes               | 604       | 53.2    | 53.2          | 53.2               |
|       | No                | 224       | 19.7    | 19.7          | 72.9               |
|       | Neutral/not sure  | 303       | 26.7    | 26.7          | 99.6               |
|       | Decline to answer | 5         | .4      | .4            | 100.0              |
|       | Total             | 1136      | 100.0   | 100.0         |                    |

**Would you prefer that health care facilities and health care professionals be fragrance-free?**

|       |                   | Frequency | Percent | Valid Percent | Cumulative Percent |
|-------|-------------------|-----------|---------|---------------|--------------------|
| Valid | Yes               | 623       | 54.8    | 54.8          | 54.8               |
|       | No                | 255       | 22.4    | 22.4          | 77.3               |
|       | Neutral/not sure  | 253       | 22.3    | 22.3          | 99.6               |
|       | Decline to answer | 5         | .4      | .4            | 100.0              |
|       | Total             | 1136      | 100.0   | 100.0         |                    |

**If you had a choice between ... flying on an airplane that pumped scented air throughout the passenger cabin, OR flying on an airplane that did not pump scented air throughout the passenger cabin. Which would you choose?**

|       |                              | Frequency | Percent | Valid Percent | Cumulative Percent |
|-------|------------------------------|-----------|---------|---------------|--------------------|
| Valid | Airplane with scented air    | 268       | 23.6    | 23.6          | 23.6               |
|       | Airplane without scented air | 672       | 59.2    | 59.2          | 82.7               |
|       | Neutral/not sure             | 189       | 16.6    | 16.6          | 99.4               |
|       | Decline to answer            | 7         | .6      | .6            | 100.0              |
|       | Total                        | 1136      | 100.0   | 100.0         |                    |

**If you had a choice between... staying in a hotel with fragranced air OR staying in a hotel without fragranced air. Which would you choose?**

|       |                              | Frequency | Percent | Valid Percent | Cumulative Percent |
|-------|------------------------------|-----------|---------|---------------|--------------------|
| Valid | Hotel with fragranced air    | 316       | 27.8    | 27.8          | 27.8               |
|       | Hotel without fragranced air | 631       | 55.5    | 55.5          | 83.4               |
|       | Neutral/not sure             | 185       | 16.3    | 16.3          | 99.6               |
|       | Decline to answer            | 4         | .4      | .4            | 100.0              |
|       | Total                        | 1136      | 100.0   | 100.0         |                    |

**What is your household annual income?**

|       |                     | Frequency | Percent | Valid Percent | Cumulative Percent |
|-------|---------------------|-----------|---------|---------------|--------------------|
| Valid | Less than \$10,000  | 73        | 6.4     | 6.4           | 6.4                |
|       | \$10,000 - \$49,999 | 370       | 32.6    | 32.6          | 39.0               |
|       | \$50,000 - \$99,999 | 371       | 32.7    | 32.7          | 71.7               |
|       | \$100,000-\$149,999 | 176       | 15.5    | 15.5          | 87.1               |
|       | \$150,000-\$200,000 | 65        | 5.7     | 5.7           | 92.9               |
|       | Over \$200,000      | 28        | 2.5     | 2.5           | 95.3               |
|       | Decline to answer   | 53        | 4.7     | 4.7           | 100.0              |
|       | Total               | 1136      | 100.0   | 100.0         |                    |

**What is your gender?**

|       |        | Frequency | Percent | Valid Percent | Cumulative Percent |
|-------|--------|-----------|---------|---------------|--------------------|
| Valid | Male   | 525       | 46.2    | 46.2          | 46.2               |
|       | Female | 611       | 53.8    | 53.8          | 100.0              |
|       | Total  | 1136      | 100.0   | 100.0         |                    |

**What is your age?**

|       |       | Frequency | Percent | Valid Percent | Cumulative Percent |
|-------|-------|-----------|---------|---------------|--------------------|
| Valid | 18-24 | 125       | 11.0    | 11.0          | 11.0               |
|       | 25-34 | 265       | 23.3    | 23.3          | 34.3               |
|       | 35-44 | 290       | 25.5    | 25.5          | 59.9               |
|       | 45-54 | 252       | 22.2    | 22.2          | 82.0               |
|       | 55-65 | 204       | 18.0    | 18.0          | 100.0              |
|       | Total | 1136      | 100.0   | 100.0         |                    |
